# 1 Short-term outcomes of the digital combined lifestyle intervention

## 2 Cool-MiGuide: a descriptive case series study

3 Nicole Philippens<sup>1,¶,\*</sup>, Ester Janssen<sup>1,¶</sup>, Stef Kremers<sup>1</sup> and Rik Crutzen<sup>2</sup>

4 <sup>1</sup> Department of Health Promotion, NUTRIM, School of Nutrition and Translational Research in  
5 Metabolism, Maastricht University, Maastricht, the Netherlands.

6 <sup>2</sup> Department of Health Promotion, CAPHRI, Care & Public Health Research Institute, Maastricht  
7 University, Maastricht, the Netherlands.

8 ¶ These authors contributed equally to this work.

9 \* Corresponding author: [n.philippens@maastrichtuniversity.nl](mailto:n.philippens@maastrichtuniversity.nl) (NP)

10

11 Keywords: lifestyle, CoolL, digital CoolL, digital CLI, overweight, obesity, e-health, Cool-MiGuide,  
12 MiGuide.

## 13 Abstract

14 **Introduction:** The objective of this study is to investigate the changes over time in anthropometrics,  
15 behaviours and health perceptions after eight months of participation in the Combined Lifestyle  
16 Intervention (CLI) Cool-MiGuide, a digital version of the Coaching on Lifestyle (CoolL) intervention  
17 with the add-on of a digital platform and an app.

18 **Method:** Longitudinal data were collected between January 2022 and December 2023 from adults,  
19 mainly in the South-Western area of the Netherlands, that meet the inclusion criteria for the CLI (i.e.  
20 being obese (Body Mass Index (BMI)>30) or being overweight (25<BMI<30) combined with  
21 comorbidity; and being sufficiently motivated). We collected a broad set of data at baseline (T0) and  
22 after eight months of participation (T1) on anthropometrics (self-reported weight, length, waist  
23 circumference), control and support (self-mastery, social support), physical activity (sedentary time

**NOTE: This preprint reports new research that has not been certified by peer review and should not be used to guide clinical practice.**

24 on least/most active days, physical active minutes), diet attentiveness (attentiveness to meal  
25 composition, amounts of food and consuming), alcohol consumption, smoking, perceived fitness  
26 (perceived health, fitness when waking, fitness during daytime, impact daily stress), sleep and stress.  
27 Changes over time were analyzed using paired t-tests comparing T1 to baseline. Effect sizes were  
28 calculated using Cohen's d.

29 **Results:** The results show positive changes after eight months in anthropometrics, sedentary time,  
30 diet attentiveness, sleep, stress, fitness, and perceived health of the participants. Largest effect sizes  
31 were found for weight (Cohen's  $d=0.62$ , average weight loss of 3.82kg), perceived health (Cohen's  
32  $d=0.58$ ) and perceived fitness of the participants when waking and during daytime (Cohen's  $d=0.41$   
33 and 0.52 respectively).

34 **Conclusion:** Cool-MiGuide participants show relevant changes in the essential constructs perceived  
35 health and weight. The digital version of Cool can be a valuable alternative for people who prefer  
36 participation from a location of their choice.

## 37 Introduction

38 In 2022, 50.2% of Dutch people aged 18 years and older were overweight and 15.1% were obese [1].  
39 Obesity is considered a disease according to the World Health Organisation and the Dutch Health  
40 council [2, 3].

41 A Combined Lifestyle Intervention (CLI) is a health intervention for people with overweight or  
42 obesity, coaching participants towards a healthier lifestyle. A CLI exists of group and individual  
43 sessions over a course of 24 months, covering the topics of healthy diet, physical activity, and  
44 behavioural change. As of January 2019, Combined Lifestyle Interventions (CLIs) are part of basic  
45 health insurance in the Netherlands.

46 The Coaching on Lifestyle intervention (Cool) is one of six CLIs that are approved and accredited by  
47 the Dutch Institute for Public Health and Environment (in Dutch: Rijksinstituut voor Volksgezondheid  
48 en Milieu) for being effective in facilitating weight reduction. The Cool-intervention is usually offered

49 in physical mode (i.e., by means of face-to-face contact). The COVID-19 pandemic, entering the  
50 Netherlands in February 2020, caused a shift in Cool-execution modus from physical towards digital,  
51 providing additional challenges for both coaches and participants [4]. Cool-MiGuide is a digital  
52 version of Cool that was initiated during the COVID-19 pandemic and was continued afterwards as  
53 requested by Cool-referrers, care groups and Cool-participants. From the perspective of  
54 participants, the digital version of Cool is easy to use, less time consuming and appealing to a certain  
55 segment of the public (e.g., for participants providing informal care or childcare, for less mobile  
56 participants or participants with irregular working hours or locations) [5].

57  
58 In short, the inclusion criteria for CLIs in the Netherlands are being obese or overweight with co-  
59 morbidity, being 18 years or older and being sufficiently motivated to complete the two-year  
60 intervention. A detailed description of the CLI-inclusion criteria is available elsewhere [6]. For Cool-  
61 MiGuide, additional inclusion criteria apply, e.g., participants must be digitally skilled, master the  
62 Dutch language and be in possession of a smartphone and laptop, tablet or computer. Participants  
63 that apply for Cool-MiGuide but do not meet these additional inclusion criteria, as noticed by both  
64 participant and staff during the introductory phone call, are referred back to their general  
65 practitioner for participation in Cool (with face-to-face sessions) or other suitable care.

66  
67 The objective of this study is to investigate the effect of a digital version of Cool on the changes over  
68 time in anthropometrics, behaviours and health perceptions after eight months of participation.

## 69 Method

### 70 Cool

71 Cool aims for higher perceived quality of life, healthier eating habits, more physical activity, less  
72 sedentary behaviour, attention for high quality sleep and relaxation, resulting in positive changes in

73 physical outcomes such as weight, BMI and waist circumference. The monitoring of CoolL covers all  
74 areas with perceived health and weight as the primary outcome measures.  
75 CoolL includes an intake (1 hour), a behavioural change phase of eight months (phase 1) and a follow-  
76 up phase of sixteen months (phase 2). The intervention consists of a combination of individual  
77 sessions and 16 group sessions (1,5 hours each) all led by one and the same coach. Phase 1 and  
78 phase 2 both include eight group sessions with a higher density of sessions in phase 1 compared to  
79 phase 2. The CoolL-coaches are trained and licensed professionals who coach participants to take  
80 responsibility for their personal lifestyle changes by addressing motivation, personal objectives and  
81 behavioural change. Participants are stimulated and supported towards more self-steering and self-  
82 management by identifying, planning, and putting personal health related behaviour into action. The  
83 main objective of CoolL is to coach and activate participants to a sustained healthier lifestyle in line  
84 with their individual needs and goals. A detailed description of the CoolL-intervention and data  
85 collection method is available elsewhere [6].

86

#### 87 **CoolL-MiGuide: a digital version of CoolL**

88 CoolL-MiGuide is a digital version of the CoolL-intervention pursuing the same aims as CoolL. In CoolL-  
89 MiGuide, all sessions are offered in digital modus (videoconferencing) and participants can make use  
90 of a supporting MiGuide-app and MiGuide-portal offering synchronous and asynchronous  
91 communication options with the CoolL-coach and other group members, facilitating and stimulating  
92 mutual contact. In addition, the MiGuide-portal provides additional sources of information that are  
93 easily and at any time accessible, whereas the MiGuide-app provides participant specific information  
94 and challenges.

95

96 The working elements of CoolL-MiGuide are for the major part similar to CoolL. The similarities and  
97 differences in working elements between both versions have been thoroughly investigated and are  
98 elaborated in detail [7]. The CoolL-MiGuide coach pays specific attention to working elements that

99 may differ from the physical mode of the intervention, mainly related to the interaction between  
100 coach and participant(s) and among participants, i.e., experiential learning, mutual connection, and  
101 cooperation. Additionally, the regional connection of Cool-MiGuide and local health and welfare  
102 organizations, as well as the connection with local sport facilities requires extra attention. On the  
103 other hand, Cool-MiGuide offers additional working elements compared to Cool, by offering  
104 additional cues to action (via prompts, invitations to challenges, the use of behavioral diaries and  
105 self-measurements in the MiGuide-app and MiGuide-portal), more (digital) contact moments and  
106 more flexibility through participation from a location of choice (e.g. home, workplace).

107

### 108 **Study design and population**

109 As Cool is part of regular health care, a study design with a control group receiving no treatment  
110 would be unethical. Cool-MiGuide was initiated during the COVID-19 pandemic, during which a  
111 temporary extension in the CLI-regulations on health insurance, made it possible to offer Cool  
112 digitally instead of via face-to-face contact only [8]. Both the digital and face-to-face version of Cool  
113 were maintained in the aftermath of COVID-19, which makes it possible to look simultaneously at  
114 outcomes of both delivery modes of Cool.

115 The participants, all Dutch-speaking adults living in the Netherlands, were included from January  
116 2022 until December 2023, at different locations mainly in the (South-)Western part of the  
117 Netherlands. All but one participant met the inclusion criteria for participating in a CLI. In one case  
118 (n=1, 0.78 %), BMI and waist circumference at baseline were below the inclusion threshold,  
119 potentially due to lifestyle changes in the time between participant's application and the start of  
120 Cool. Since the waist circumference of this participant was above the threshold at the moment of  
121 referral, this case was included.

### 122 **Power**

123 The average effect size on the change in perceived health and weight in prior Cool-related research  
124 (0.52 and 0.56 respectively [4, 9] was used as input for the power analysis. Based on  $d=0.52$  for a  
125 difference between two dependent means, a two-tailed t-test with an alpha of 0.05, and a minimal  
126 power of 0.80, the required sample size is 32 participants.

127

## 128 **Data collection**

129 For Cool-MiGuide-participants we used the same questionnaire as for Cool- participants. The  
130 outcome measures we collected can be categorized into anthropometrics (i.e., weight/BMI and waist  
131 circumference), control and support (i.e., self-mastery and social support), physical activity (i.e.,  
132 sedentary time on least/most active days and active minutes), diet attentiveness (attentiveness to  
133 meal composition, awareness to amounts of food and attentiveness to consuming), alcohol use and  
134 smoking, perceived fitness (i.e., perceived health, perceived fitness when waking, perceived fitness  
135 during daytime and impact of stress on daily functioning), sleep and stress. A more detailed  
136 description of both questionnaire and anthropometrics is available elsewhere [6].

137 Data were collected at three time points during Cool-MiGuide: at the beginning of the intervention,  
138 during the intake (T0); after 8 months, at completion of phase 1 of the intervention (T1); and after 24  
139 months, at completion of the intervention (T2). Data from T2 were not yet available at the time of  
140 the analysis and are not presented in this article.

141 Due to the online nature of Cool-MiGuide, anthropometrics (i.e. body weight and waist  
142 circumference) were measured by the participant instead of the Cool-coach. All participants  
143 received instructions how to perform both measurements accurately. The use of the MiGuide-  
144 application stimulates participants to perform additional anthropometric measurements in between  
145 sessions in order to follow-up on their progress.

146

147 **Analyses**

148 Variables were recoded in line with the approach used in the validated questionnaires and to  
149 facilitate interpretation of the outcomes (i.e., direction of effect sizes). In addition, we performed an  
150 exploratory factor analysis and calculated McDonald's omega to assess the internal structure of  
151 items regarding the constructs using R software [10]. These analyses justified summarizing the  
152 constructs by item score means. For all items and constructs we ran descriptive analyses (e.g.,  
153 means, standard deviations). Changes in outcome measures over time were analysed using paired t-  
154 tests (T1 versus T0). Effect sizes were calculated using Cohen's d and the outcomes were interpreted  
155 in accordance with Lipsey's guidelines for each pair of outcomes, i.e., an effect size smaller than or  
156 equal to 0.32 is considered small, an effect size between 0.33 and 0.55 is considered medium and an  
157 effect size of 0.56 or above is considered large [11]. To improve comprehensibility effect sizes are  
158 represented such that positive values represent change in the desired direction whereas negative  
159 values represent change in the undesired direction.

160

161 To be considered successful, the target for the CLI (including CoolL) is a 5% weight loss after the two  
162 years intervention, as set by the Dutch Healthcare Institute (Dutch: Zorginstituut) based on the  
163 guidelines set up by the Dutch Institute for Quality in Health Care (Dutch: Centraal  
164 Begeleidingsorgaan) as well as their English counterpart (National Institute for Health and Care  
165 Excellence) [12]. The data in this study covers the first phase of CoolL-MiGuide only (8 months), still  
166 leaving 16 months to further extend weight loss. We categorized the outcomes on weight change:  
167 5% weight loss or more, between 0 and 5% weight loss, weight stabilization or weight gain.

168

169 **Ethics**

170 This study was submitted to and approved by the Research Ethics Committee of the Faculty of  
171 Health, Medicine and Life Sciences of Maastricht University (FHML-REC/2019/073). All participants  
172 gave their informed consent for their anonymised personal data to be used for research purposes.

173

174

## 175 **Funding**

176 No funding was provided for this research.

177

## 178 **Results**

179 In the result section all outcomes are displayed starting with the demographics of the participants

180 (Table 1) and followed by outcome measurements (Table 2), including mean values and standard

181 deviations as well as confidence intervals on changes in outcomes and effect sizes.

182

### 183 **Demographics**

184 A total of 129 adults started with Cool-MiGuide between Feb-2022 and May-2023, completed phase

185 1 of Cool-MiGuide before 2024 and returned the T0 and T1 questionnaires. The amount of missing

186 data differed per item per time of measurement (range 0.8-8.5%).

187

188 **Table 1.** Demographics of Cool-MiGuide participants (N= 129).

| <b>Category</b>          | <b>Demographic</b>              | <b>%</b> |
|--------------------------|---------------------------------|----------|
| <b>Gender</b>            | Male                            | 27%      |
|                          | Female                          | 73%      |
| <b>Age</b>               | <35 years                       | 13%      |
|                          | 35 – 44 years                   | 19%      |
|                          | 45 – 54 years                   | 33%      |
|                          | 55 – 64 years                   | 23%      |
|                          | ≥65 years                       | 12%      |
| <b>Living situation</b>  | Single                          | 26%      |
|                          | Single parent with kid(s)       | 6%       |
|                          | Living together, with kid(s)    | 31%      |
|                          | Living together, without kid(s) | 28%      |
|                          | Other                           | 9%       |
| <b>Country of birth</b>  | Dutch                           | 88%      |
|                          | Non-Dutch                       | 12%      |
| <b>Working situation</b> | Employed                        | 87%      |
|                          | Unemployed                      | 13%      |



|                  |                    |     |
|------------------|--------------------|-----|
| <b>Education</b> | Lower level        | 15% |
|                  | Intermediate level | 53% |
|                  | Higher level       | 32% |

189 Of all participants a total of 27% were male and 73% female. Most participants (88%) had a Dutch  
190 background. A quarter of the participants was living alone and 65% was living with children and/or  
191 partner, 87% were employed and two third of the participants had a lower or intermediate level of  
192 education (Table 1).

### 193 **Anthropometrics**

194 Weight, BMI and waist circumference all showed a decrease after eight months (T1) compared to  
195 baseline (T0). The BMI of the participants was on average 36.6 at baseline and decreased with 1.3  
196 BMI-points at T1. The average weight loss was 3.8 kg at T1, corresponding to a 3.5% average weight  
197 loss per participant after eight months. In total 80% of the participants lost weight and 28% of the  
198 participants lost over 5% body weight at T1. The average waist circumference of the participants  
199 decreased from 115.5 cm at T0 to 113.3 cm at T1. The change in waist circumference demonstrated a  
200 small effect size (Cohen's  $d=0.28$ ) at T1, whereas weight and BMI showed a large effect size at T1  
201 (0.62 and 0.63 respectively).

202

### 203 **Control and support**

204 Self-mastery and social support showed no changes at T1 compared to baseline.

205

### 206 **Physical activity**

207 Sedentary time decreased at T1 both for least and most active days of the week: participants sat on  
208 average 40 minutes less on least active and 46 minutes less on most active days, compared to  
209 baseline. The effect size on sedentary time was small (between 0.23 and 0.31). The average daily  
210 active minutes showed no changes at T1 compared to baseline.

211

### 212 **Diet attentiveness, alcohol and smoking**

213 Over time the participants showed an increase in attentiveness for meal composition, awareness for  
 214 the amounts of food selected and attentiveness when consuming food. The effect size on all three  
 215 items was medium-sized (0.36, 0.37 and 0.34 respectively) when comparing baseline to T1.  
 216 74% of the participants indicated a healthier or much healthier eating pattern, 25% indicated no  
 217 change and 1% ate less healthy at T1 compared to baseline. Alcohol consumption and smoking  
 218 showed no change at T1 compared to baseline, though the number of smokers decreased from eight  
 219 to six between baseline and T1.

220

221 **Perceived fitness**

222 The indicators for perceived fitness, i.e. perceived health, feeling fit when waking up, feeling fit  
 223 during the day and the impact of stress on daily functioning, all showed an effect in the desired  
 224 direction. The effect size was small for the impact of stress on daily functioning (0.23), medium for  
 225 feeling fit when waking up and feeling fit during the day (0.41 and 0.52 respectively) and large for  
 226 perceived health (0.58).

227

228 **Sleep and stress**

229 The constructs sleep and stress both showed a decrease at T1 compared to baseline with a small  
 230 effect (0.27 and 0.22 respectively) in the desired direction.

231

232 **Table 2.** Results on all Cool-MiGuide outcome measurements (N=129).

| Category             | Construct / factor               | T0 M (sd)      | T1 M (sd)      | $\Delta$ T0-T1 [95% CI] | d**   |
|----------------------|----------------------------------|----------------|----------------|-------------------------|-------|
| Anthropo-<br>metrics | Weight                           | 108.66 (23.47) | 104.94 (23.03) | -3.82 [-4.91; -2.72]*   | 0.62  |
|                      | BMI                              | 36.62 (6.96)   | 35.33 (6.78)   | -1.32 [-1.69; -0.95]*   | 0.63  |
|                      | Waist circumference              | 115.53 (15.10) | 113.32 (15.77) | -2.37 [-3.91; -0.83]*   | 0.28  |
| Control &<br>support | Self-mastery                     | 3.30 (0.70)    | 3.35 (0.63)    | 0.04 [-0.07; 0.15]      | -0.07 |
|                      | Social support                   | 3.61 (0.93)    | 3.72 (0.79)    | 0.10 [-0.04; 0.23]      | 0.12  |
| Physical<br>activity | Sedentary time (least<br>active) | 8.67 (3.34)    | 8.01 (2.90)    | -0.67 [-1.18; -0.15]*   | 0.23  |
|                      | Sedentary time (most<br>active)  | 5.30 (2.94)    | 4.55 (2.58)    | -0.76 [-1.19; -0.33]*   | 0.31  |
|                      | Physical active minutes          | 82.53 (101.82) | 90.22 (112.32) | 7.69 [-11.00; 26.38]    | 0.07  |

|                                         |                                    |              |              |                       |      |
|-----------------------------------------|------------------------------------|--------------|--------------|-----------------------|------|
| Diet attentiveness, alcohol and smoking | Attentiveness for meal composition | 3.20 (0.87)  | 3.52 (0.65)  | 0.32 [0.17; 0.48]*    | 0.36 |
|                                         | Awareness for amounts of food      | 3.15 (0.87)  | 3.52 (0.71)  | 0.37 [0.20; 0.55]*    | 0.37 |
|                                         | Attentiveness to consuming         | 2.98 (0.93)  | 3.26 (0.79)  | 0.28 [0.13; 0.42]*    | 0.34 |
|                                         | Alcohol consumption                | 1.37 (2.20)  | 1.37 (2.16)  | 0.00 [-0.34; 0.34]    | 0.00 |
|                                         | Smoking***                         | 0.63 (3.02)  | 0.29 (2.00)  | -0.35 [-0.73; 0.03]   | 0.16 |
| Perceived fitness                       | Perceived health                   | 8.64 (2.06)  | 9.74 (1.67)  | 1.10 [0.77; 1.43]*    | 0.58 |
|                                         | Fitness (when waking)              | 2.13 (0.80)  | 2.46 (0.79)  | 0.33 [0.19; 0.47]*    | 0.41 |
|                                         | Fitness (during daytime)           | 2.21 (0.78)  | 2.60 (0.78)  | 0.38 [0.26; 0.51]*    | 0.52 |
|                                         | Impact stress (daily)              | 2.02 (0.91)  | 2.22 (0.98)  | 0.20 [0.05; 0.36]*    | 0.23 |
| Sleep                                   | Sleep (summary)                    | 12.40 (3.68) | 11.50 (3.34) | -0.86 [-1.40; -0.31]* | 0.27 |
| Stress                                  | Stress (summary)                   | 19.00 (5.82) | 17.98 (5.60) | -0.96 [-1.74; -0.19]* | 0.22 |

233 \*p<0.05

234 \*\*Positive effect size representing an effect in desired direction, negative effect size representing an  
235 effect in undesired direction

236 \*\*\* The dataset contains eight smokers at T0 and six remaining smokers at T1.

237

## 238 Discussion

239 This is the first study on Cool fully offered in digital mode in combination with the MiGuide-app and  
240 MiGuide-platform. The results of Cool-MiGuide show positive changes in self-reported  
241 anthropometrics, behaviours (sedentary time, diet attentiveness) and perceptions (sleep, stress,  
242 fitness, and health) of the participants after eight months. Largest effect sizes were found on weight  
243 (0.62)/BMI (0.63), and perceived health (0.58). Medium effect sizes were found on diet attentiveness  
244 (between 0.34-0.37) and perceived fitness (between 0.41-0.52).

245

246 The set-up, approach and content of Cool is adopted in Cool-MiGuide, ensuring a similar  
247 intervention, enabling comparison on delivery mode. When comparing Cool-MiGuide with earlier  
248 research on Cool, a notably similar pattern in outcomes is visible: small to medium effect sizes in  
249 behaviours and awareness, and relatively large effect sizes in weight and perceived health [4, 9].

250

251 The effect size on waist circumference (0.28) does not keep pace with the effect size on weight (0.62)  
252 and remains smaller compared to earlier research on Cool [4, 9]. Preferably, waist circumference  
253 measurements are done by professionals, as is the case for Cool, since these measurements require  
254 a strict protocol, training and repeated measurements [13]. Measuring waist circumference  
255 accurately on an occasional basis by non-professionals is challenging. For Cool-MiGuide these  
256 measurements were carried out by participants themselves, potentially creating a larger margin of  
257 error. Still, a change can be detected, as demonstrated by the outcomes of Cool-MiGuide, but is  
258 simply more difficult to capture (i.e., reduced sensitivity). The weight measurements, done by the  
259 participants themselves on ordinary home equipment, generate lower reliability as well, but  
260 potential deviations in the equipment are unlikely within the timeframe of eight months.

261  
262 Cool-MiGuide-participants reported to have reduced their sedentary time and felt more fit when  
263 waking and during the day, whereas on physical activity (PA) no effect was visible. The results, a  
264 decrease in sedentary time and limited or no effect on PA, the latter in combination with large  
265 confidence intervals, are in line with earlier research on Cool [4]. Requesting input on minimum  
266 bouts of PA of 10 minutes, as well as the general perception of PA (i.e., being intensive) might raise  
267 barriers for registration. However, the decrease in sedentary time is already promising, as sedentary  
268 time is likely to be displaced by light intensive activity, generating a positive impact on health [14]. A  
269 finding that seems to be supported in this study by the improved outcomes on all constructs of  
270 perceived fitness for Cool-MiGuide-participants.

271  
272 The Cool-MiGuide-sample, compared to previous studies on Cool, shows a similar gender  
273 distribution, but contains more participants with a non-Dutch background, more participants who  
274 are single, with a job and participants with an intermediate-level of education. Participants with a  
275 lower level of education are less represented. A process evaluation on the Cool-MiGuide-  
276 implementation in June 2023 showed that as much as 92% of the applicants for Cool-MiGuide

277 effectively started with the intervention [5]. Reasons for not starting were mostly independent of the  
278 delivery mode of Cool-MiGuide (insufficient knowledge of Dutch language, dislike for group sessions,  
279 no motivation for intensive program) and partly related to the digital version (disliking digital  
280 interventions). However, a larger number of participants is needed to shed light on the sociological  
281 differences between participants attracted by the different delivery modes of CoolL.

282

283 The complementary offering of Cool-MiGuide might positively impact the motivation of the  
284 participants. Providing participants with a choice between a physical or digital program mode,  
285 contributes to the perception of self-control and autonomy and assures a better fit with the  
286 participants needs and wishes thereby preventing dropout and enhancing motivation to participate.

287

### 288 **Strengths and limitations**

289 This study has several strengths. Firstly, a broad scope of data is collected. Secondly, we were able to  
290 investigate a topical and innovative adaptation of an existing evidence-based intervention which  
291 enables further testing, development, implementation and scale-up.

292 There are also some limitations in this study. To begin, Cool-MiGuide does not yet offer nationwide  
293 coverage though quite some regions are already in scope. Secondly, due to the digital mode of  
294 delivery, the anthropometrics are collected by self-measurement thereby generating a larger margin  
295 of error than measurements done by professionals.

296

### 297 **Recommendations for future research**

298 We recommend future research on Cool-MiGuide to address the following topics:

- 299 • Study on the long-term effects of the Cool-MiGuide intervention (i.e., including 24 months  
300 measurements).

- 301 • Study on the characteristics of the participants that are appealed by the digital version of
- 302 Cool and participants that are not, as well as on the characteristics of participants that drop-
- 303 out of Cool-MiGuide, in order to maximize digital inclusion when scaling up the intervention.
- 304 • Study on the overall dropout rates of Cool when offering the choice between physical and
- 305 digital mode of Cool.
- 306 • Study on the social cohesion within a Cool-MiGuide group of participants compared to
- 307 similar interventions offering face-to-face contact moments and its impact on the outcomes
- 308 of the intervention.

309

## 310 Conclusion

311 Cool-MiGuide-participants show relevant short-term changes in the essential constructs of  
312 perceived health and weight. The digital version of Cool can be a valuable alternative to physical  
313 combined lifestyle interventions for people who prefer participation from a location of their choice.

## 314 Abbreviations

315 BMI: Body Mass Index

316 CLI: Combined Lifestyle Intervention

317 Cool: Coaching op Leefstijl

318 PA: physical activity

319

## 320 Acknowledgements

321 The authors like to thank the MiGuide Organization, Cool-MiGuide-coaches and the Cool-MiGuide-  
322 participants for their efforts to make this research possible.

323

## 324 References

- 325
- 326 1. Overgewicht: leeftijd en geslacht volwassenen Bilthoven: RIVM; 2023 [cited 2023  
327 February 13]. Available from: <https://www.vzinfo.nl/overgewicht/leeftijd-geslacht>.
- 328 2. James WPT. The fundamental drivers of the obesity epidemic. *Obesity Reviews*.  
329 2008;9(s1):6-13.
- 330 3. Overgewicht en obesitas. Den Haag: Gezondheidsraad 2003
- 331 4. Janssen E, Philippens N, Kremers S, Crutzen R. Outcomes of the combined lifestyle  
332 intervention Cool during COVID-19: a descriptive case series study. *BMC public health*.  
333 2024;24(1):40.
- 334 5. Huizinga A, Philippens N, Janssen, E. Procesevaluatie Cool-MiGuide. Amersfoort  
335 2024. [Available from: [https://leefstijlinterventies.nl/wp-](https://leefstijlinterventies.nl/wp-content/uploads/2024/01/Procesevaluatie-Cool-MiGuide_dec2023_public.pdf)  
336 [content/uploads/2024/01/Procesevaluatie-Cool-MiGuide\\_dec2023\\_public.pdf](https://leefstijlinterventies.nl/wp-content/uploads/2024/01/Procesevaluatie-Cool-MiGuide_dec2023_public.pdf).
- 337 6. Philippens N, Janssen, E. Coaching on Lifestyle (Cool): background on the  
338 intervention and data collection. Frankfurt (DE): Open Science Framework; 2024. [Available  
339 from: <https://osf.io/fer7t/>.
- 340 7. Philippens N, Janssen E. Beschrijving Cool-MiGuide. Loket Gezond Leven.:  
341 Rijksinstituut voor Volksgezondheid en Milieu. Ministerie van Volksgezondheid,  
342 Welzijn en Sport. ; 2023 [updated August 2023. Available from:  
343 <https://www.loketgezondleven.nl/interventies-zoeken#/InterventionDetails/2300152>.
- 344 8. De gecombineerde leefstijlinterventie tijdens de coronacrisis. Zeist: Zorgverzekeraars  
345 Nederland 2020 [cited 2023 January 12]. Available from:  
346 [https://assets.ctfassets.net/zuqczfw7awmp/1SH7ralefGkyAL2eJFvklh/4d99d183e2720d7be7](https://assets.ctfassets.net/zuqczfw7awmp/1SH7ralefGkyAL2eJFvklh/4d99d183e2720d7be7e4c089c61a10dd/De_gecombineerde_leefstijlinterventie_tijdens_de_coronacrisis.pdf)  
347 [e4c089c61a10dd/De\\_gecombineerde\\_leefstijlinterventie\\_tijdens\\_de\\_coronacrisis.pdf](https://assets.ctfassets.net/zuqczfw7awmp/1SH7ralefGkyAL2eJFvklh/4d99d183e2720d7be7e4c089c61a10dd/De_gecombineerde_leefstijlinterventie_tijdens_de_coronacrisis.pdf).
- 348 9. Philippens N, Janssen E, Kremers S, Crutzen R. Keep it Cool! Results of a two-year  
349 Cool-intervention: a descriptive case series study. Article under review. medRxiv.  
350 2023:2023.06. 15.23291479.
- 351 10. Philippens N, Janssen E, Crutzen R. Cool-MiGuide exploratory factor analysis.  
352 Frankfurt (DE): Open Science Framework; 2024 [Available from: <https://osf.io/fjctx/>.
- 353 11. Lipsey MW. Design sensitivity : statistical power for experimental research. Newbury  
354 Park, CA: Sage Publications; 1990.
- 355 12. van der Meer FM, Ligtenberg G, Staal PA. Preventie bij overgewicht en obesitas: de  
356 gecombineerde leefstijlinterventie. College voor zorgverzekeringen; 2009.
- 357 13. Verweij LM, Terwee CB, Proper KI, Hulshof CT, van Mechelen W. Measurement error  
358 of waist circumference: gaps in knowledge. *Public health nutrition*. 2013;16(2):281-8.
- 359 14. Mansoubi M, Pearson N, Biddle SJH, Clemes S. The relationship between sedentary  
360 behaviour and physical activity in adults: A systematic review. *Preventive Medicine*.  
361 2014;69:28-35.
- 362
